# Supplementary material for: Gelsolin Contributes to the Motility of A375 Melanoma Cells and This Activity Is Mediated by the Fibrous Extracellular Matrix Protein Profile
Source: MDPI journal article supplement (doi:10.3390/cells10081848), 2021-07-21
Supplement: s1 [file s1]

# **Gelsolin contributes to the motility of A375 melanoma cells and this activity is mediated by the fibrous extracellular matrix protein profile**

Ewa Mazurkiewicz, Aleksandra Makowiecka, Ewa Mrówczyńska, Iryna Kopernyk, Dorota Nowak, Antonina J. Mazur\*

Department of Cell Pathology, Faculty of Biotechnology,  
University of Wrocław, Poland

### **\*Corresponding author:**

Dr. Antonina Joanna Mazur, DSc  
antonina.mazur@uwr.edu.pl  
Department of Cell Pathology  
Faculty of Biotechnology  
University of Wrocław  
ul. Joliot-Curie 14a  
50-383 Wrocław  
tel. + 48 71 37 56 206

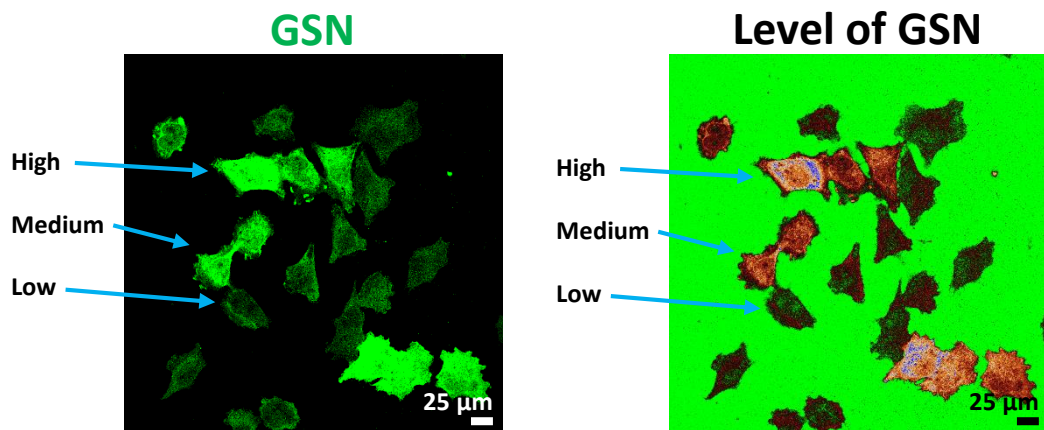

**Fig. S1 The way the distribution ratio of the cells with different GSN level was calculated.** The „Over-/Underexposure” tool of the LasX software (Leica) was used to assess the intensity of fluorescence signal in the A375 cells and control clones. This figure corresponds to Fig. 2B and 3C in the main text. Scale bar: 25 µm.

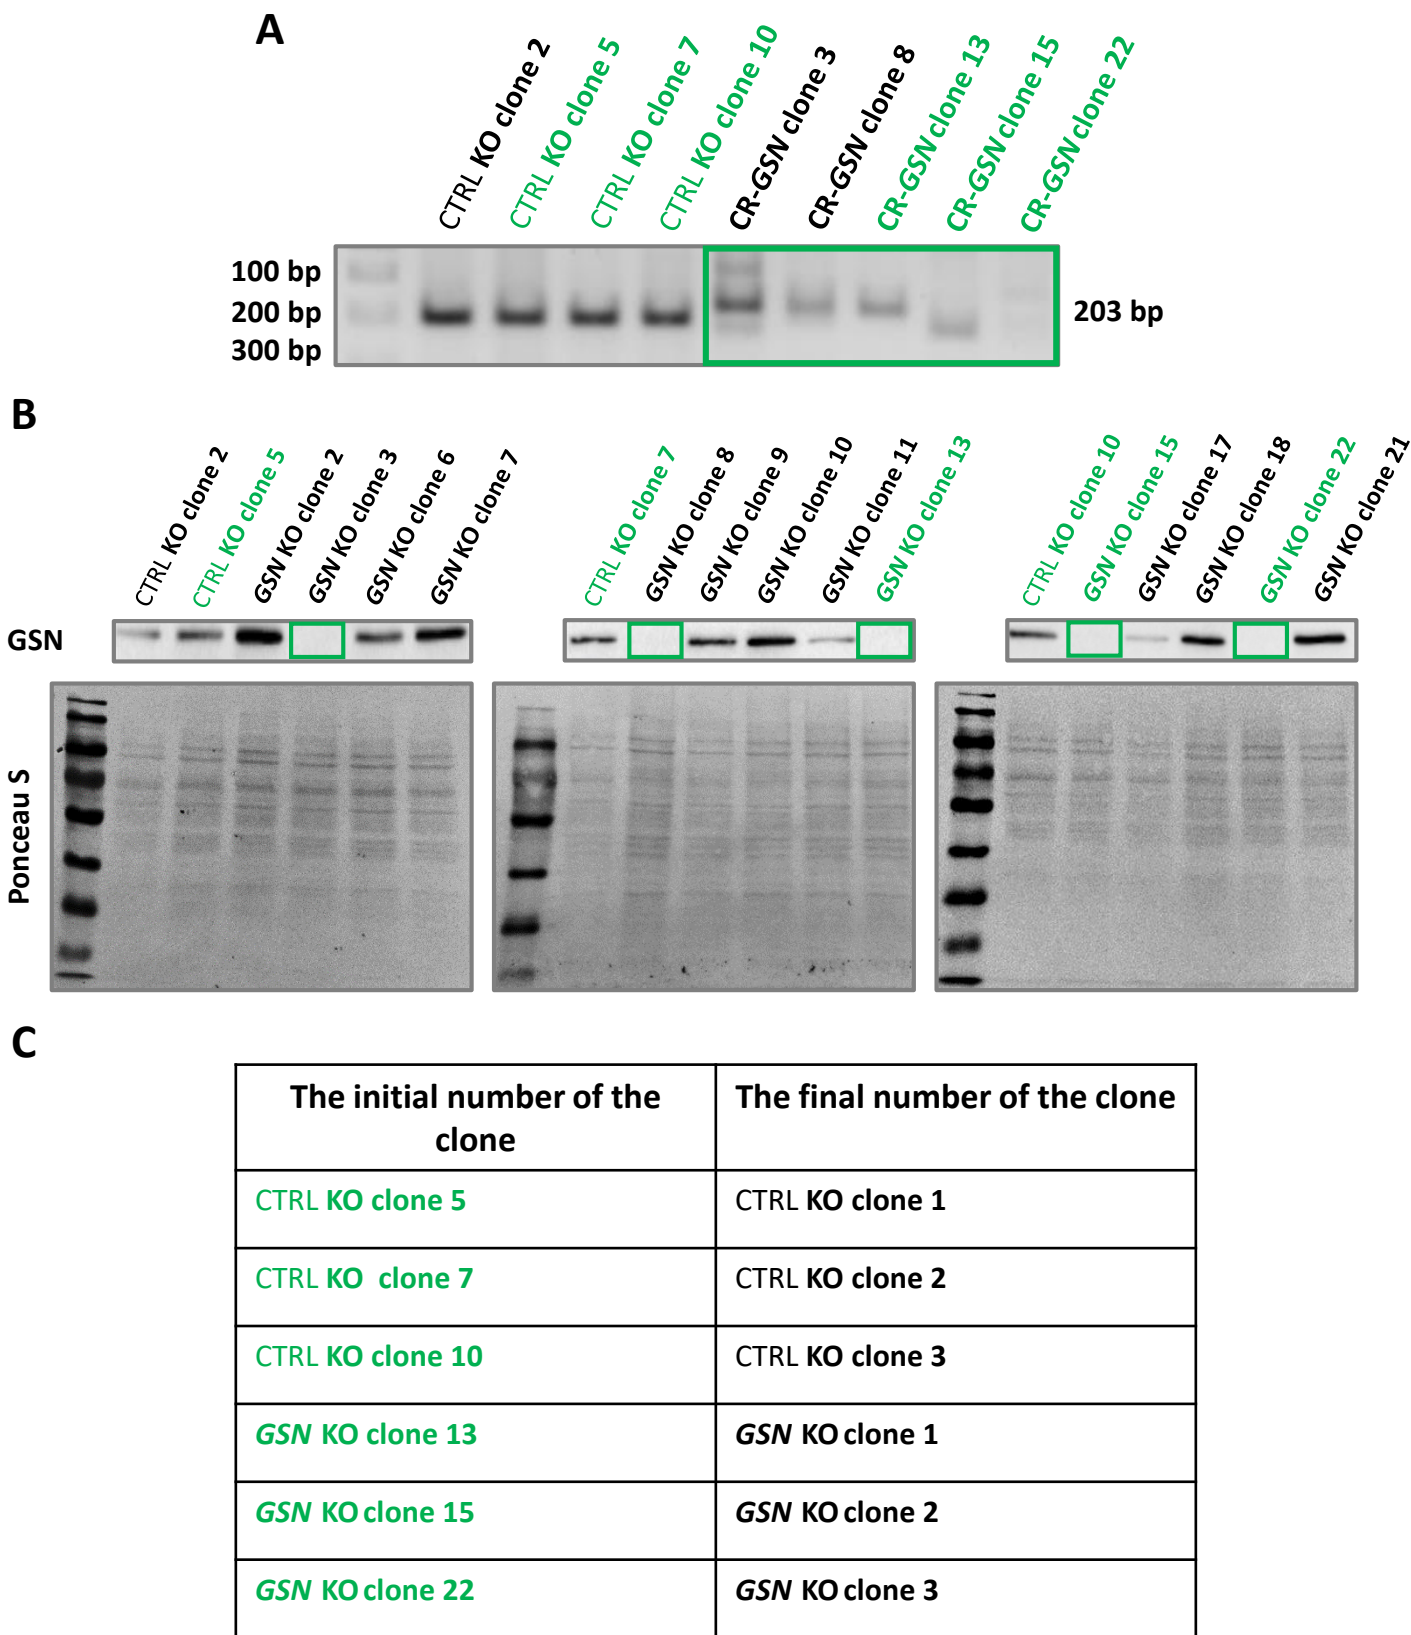

**Fig. S2 Verification of cell clones' correctness.** (A) Analysis of gDNA of A375 cell clones obtained upon the usage of CRISPR/Cas9(D10A) technique. 100 ng of isolated gDNAs served as templates for subsequent PCR reactions performed with appropriate starters. Products of PCR reactions were analyzed in 2% TAE agarose gel. bp - base pairs. (B) Western blot analysis of clones' lysates for the presence of GSN. 30 µg of protein were loaded on every lane. Ponceau S membrane stainings were performed as total protein analysis (TPA) of the membranes. (C) Nomenclature of the clones used in the study.

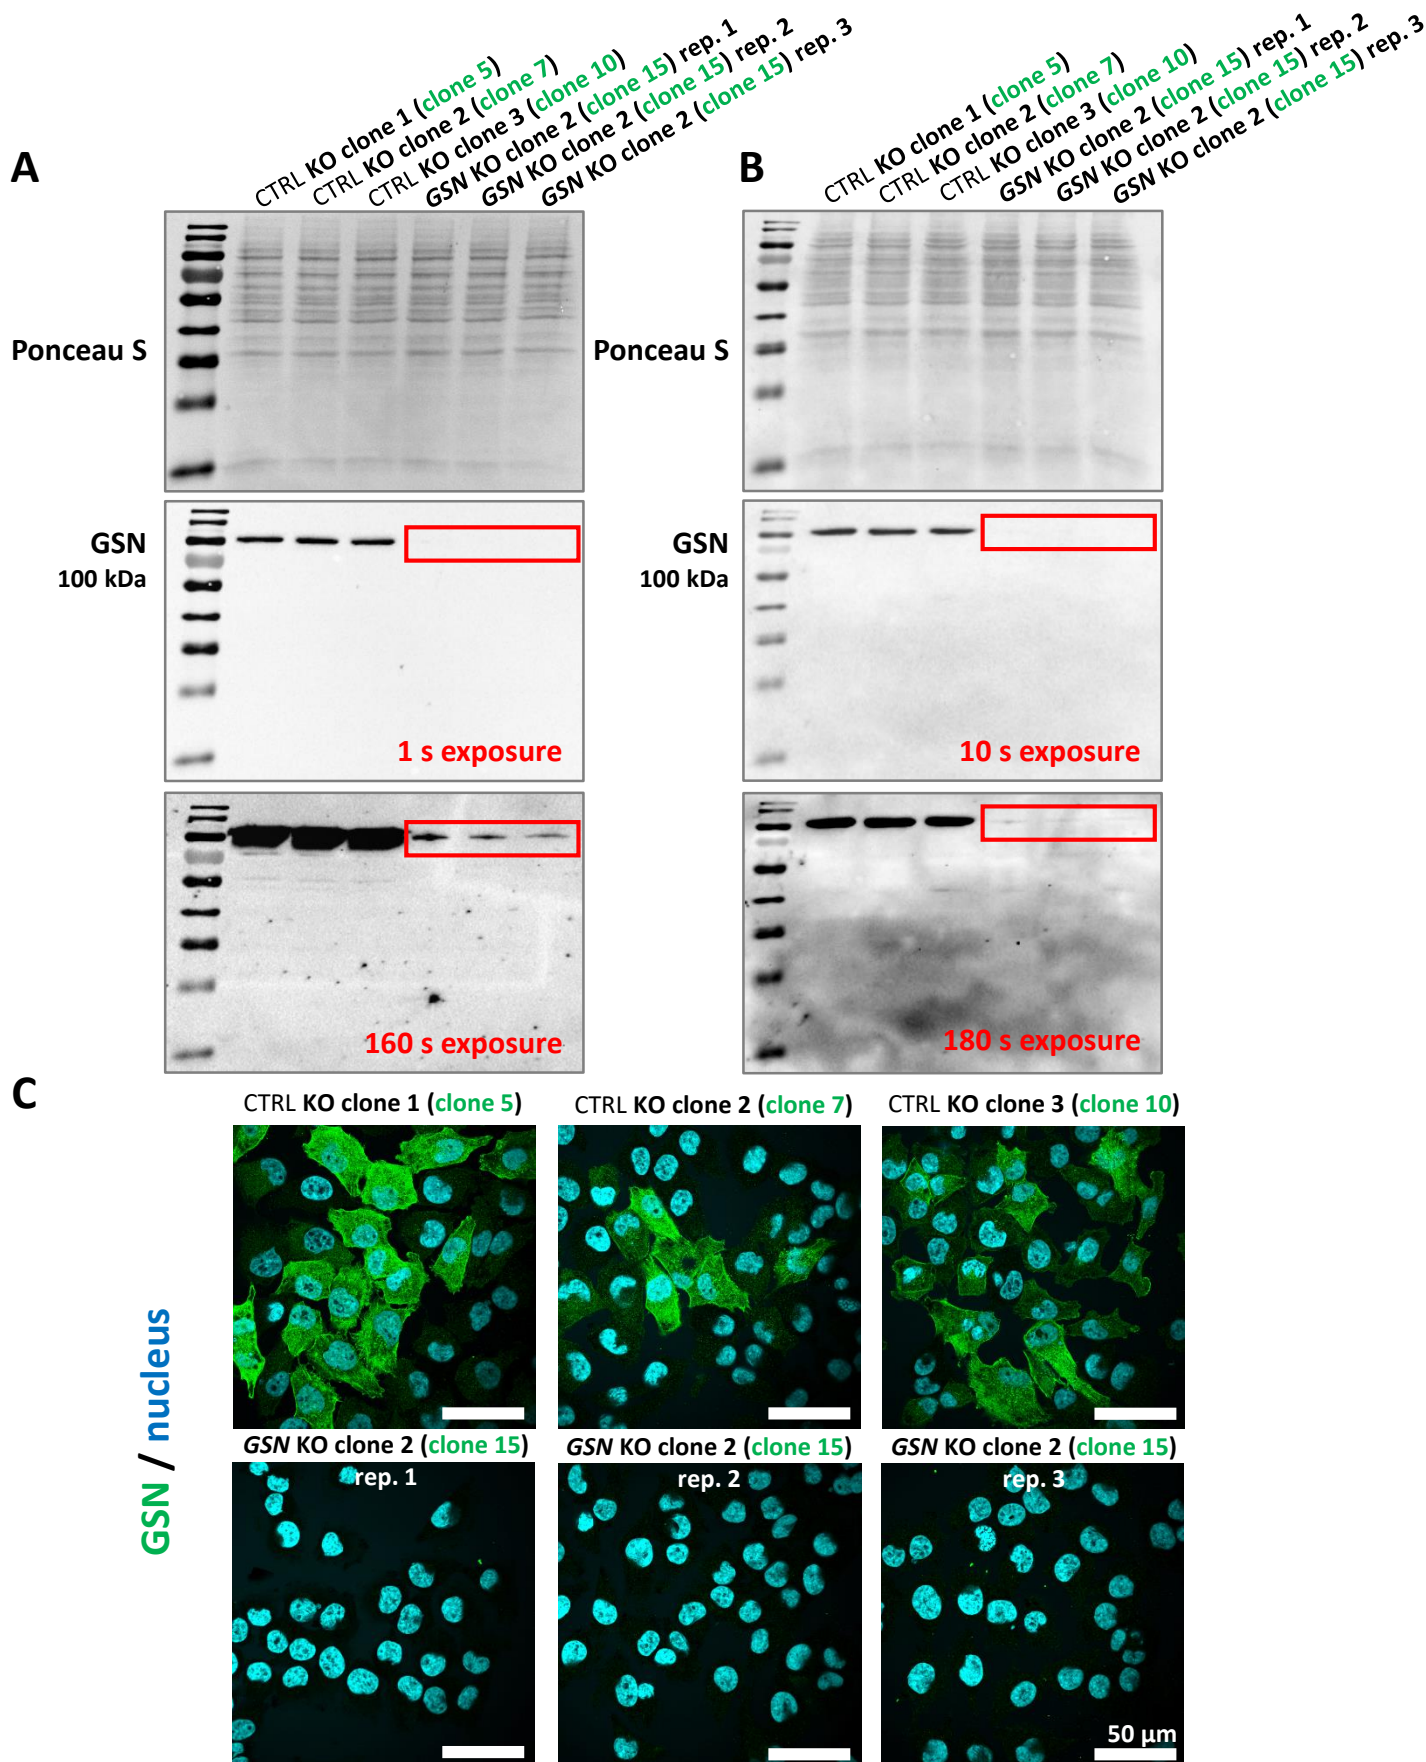

**Fig. S3 GSN is produced in GSN KO clone 2 at a very low level.** Western blot analysis of clones' lysates for the presence of GSN. The membranes were probed for GSN with mouse anti-GSN (A) and goat anti-GSN (B) antibodies. 30  $\mu$ g of protein were loaded on every lane. Long and short exposure times were applied. Red rectangles highlight GSN bands in three times collected lysates of GSN KO clone 2. Ponceau S membrane stainings were performed as total protein analysis (TPA) of the membranes. (C) Immunocytochemical analysis of three control clones and three repetitions of GSN KO clone 2. GSN was detected by application of mouse anti-GSN antibodies, whereas F-actin and nucleus were detected by using fluorescently labeled phalloidin and Hoechst 33342. Staining for GSN KO clone 2 was repeated three times. Images were acquired at the same settings. Scale bar: 50  $\mu$ m.

|              |                                                                          |
|--------------|--------------------------------------------------------------------------|
| CTRL_KO      | GGCTTTTCTCAGCTTCTACAGCTAGGTCAGGGCAGTGCTGGGGTTTCCTCCTCCACCTCCTC           |
| GSN_KO_c11.1 | GGCTTTTCTCAGCTTCTACAGCTAGGTCAGGGCAGTGCTGGGGTTTCCTCCTCCACCTCCTC           |
| GSN_KO_c11.2 | GGCTTTTCTCAGCTTCTACAGCTAGGTCAGGGCAGTGCTGGGGTTTCCTCCTCCACCTCCTC           |
| GSN_KO_c12.1 | GGCTTTTCTCAGCTTCTACAGCTAGGTCAGGGCAGTGCTGGGGTTTCCTCCTCCACCTCCTC           |
| GSN_KO_c12.2 | GGCTTTTCTCAGCTTCTACAGCTAGGTCAGGGCAGTGCTGGGGTTTCCTCCTCCACCTCCTC           |
| GSN_KO_c13.1 | GGCTTTTCTCAGCTTCTACAGCTAGGTCAGGGCAGTGCTGGGGTTTCCTCCTCCACCTCCTC           |
| GSN_KO_c13.2 | GGCTTTTCTCAGCTTCTACAGCTAGGTCAGGGCAGTGCTGGGGTTTCCTCCTCCACCTCCTC           |
|              | *****                                                                    |
| CTRL_KO      | TTCTCAGGGGTCTGGGATACTTCTG--GAAAGCCAGGCTCATATTGCTCTGATGTC---              |
| GSN_KO_c11.1 | TTCTCAGGGGTCTGGGATACTTCTG--GAAAGCCAGGCTCATATTGCTCTGATGTC---              |
| GSN_KO_c11.2 | TTCTCAGGGGTCTGGGATACTTCTG--GAAAGCCAGGCTCATATTGCTCTGATGTC---              |
| GSN_KO_c12.1 | TTCTCAGGGGTCTGGGATACTTCTG--GAAAGCCAGGCTCATATTGCTCTGATGTC---              |
| GSN_KO_c12.2 | TTCTCAGGGGTCTGGGATACTTCTG--GAAAGCCAGGCTCATATTGCTCTGATGTC---              |
| GSN_KO_c13.1 | TTCTCAGGTGCAGTGGATGACTACCTGAACGGCCGGGCCGTGTTACCGTGCAGCTGGA               |
| GSN_KO_c13.2 | TTCTCAGGGGTCTGGGATACTTCTG--GAAAGCCAGGCTCATATTGCTCTGATGTC---              |
|              | ***** * * * * * * * * * * *                                              |
| CTRL_KO      | -----CCGTAGG-----                                                        |
| GSN_KO_c11.1 | -----CCGTAGG-----                                                        |
| GSN_KO_c11.2 | -----CCGTAGG-----                                                        |
| GSN_KO_c12.1 | -----CCGTAGG-----                                                        |
| GSN_KO_c12.2 | -----CCGTAGG-----                                                        |
| GSN_KO_c13.1 | TGACTACCTGAACGGCCGGGCCGTGCAGCACCGTGCAGCTGGATGACTACCTGAACGGCC             |
| GSN_KO_c13.2 | -----CCGTAGG-----                                                        |
|              | ****                                                                     |
| CTRL_KO      | ---CA---ATGAGTGCAGCCAG-----                                              |
| GSN_KO_c11.1 | ---CA---ATGAGTGCAGCCAG-----                                              |
| GSN_KO_c11.2 | ---CA---ATGAGTGCAGCCAG-----                                              |
| GSN_KO_c12.1 | ---CA---ATGAGTGCAGCCAG-----                                              |
| GSN_KO_c12.2 | ---CA---ATGAGTGCAGCCAG-----                                              |
| GSN_KO_c13.1 | GGGCCGTGTTACCGTGCAGCTGGATGACTACCTGAACGGCCGGGCCGTGCAGCACCGTGC             |
| GSN_KO_c13.2 | ---CA---ATGAGTGCAGCCAG-----                                              |
|              | * ***** *                                                                |
| CTRL_KO      | -----GATGA-GAGCGGGGC-GGCCGCCATCTTTACCGTGC-----                           |
| GSN_KO_c11.1 | -----GATGA-GAGCGGGGC-GGCCGCCATCTTTACCGTGCAGCTG-----                      |
| GSN_KO_c11.2 | -----GATGA-GAGCGGGGC-GGCCGCCATCTTTACCGTGCAGCTG-----                      |
| GSN_KO_c12.1 | -----GATGA-GAGCGGGGC-GGCCGCCATCTTTACCGTGCAGCTG-----                      |
| GSN_KO_c12.2 | -----GATGA-GAGCGGGGC-GGCCGCCATCTTTACCGTGCAGCTG-----                      |
| GSN_KO_c13.1 | AGCTGGATGACTACCTGAACGGCCGGGCCGTGTTACCGTGCAGCTGGATGACTACCTGAA             |
| GSN_KO_c13.2 | -----GATGA-GAGCGGGGC-GGCCGCCATCTTTACCGTGC- <b>INSERTION-4117nt</b> ----- |
|              | ***** * * * * * * * * * *                                                |
| CTRL_KO      | -----AGC                                                                 |
| GSN_KO_c11.1 | -----GAT-----GACT                                                        |
| GSN_KO_c11.2 | -----GAT-----TTAC                                                        |
| GSN_KO_c12.1 | -----AAT-----GACT                                                        |
| GSN_KO_c12.2 | -----GAT-----GAGC                                                        |
| GSN_KO_c13.1 | CGGCCGGGCCGTGCAGCACCGTGCAGCTGGATGACTACCTGAACGGCCGGGCCGTGTTAC             |
| GSN_KO_c13.2 | -----AGC                                                                 |
| CTRL_KO      | TGGATGA-----                                                             |
| GSN_KO_c11.1 | ACCTGAAC-----GGCCGGGCC                                                   |
| GSN_KO_c11.2 | CGTGCAGC-----TGGATGACT                                                   |
| GSN_KO_c12.1 | ACC-----                                                                 |
| GSN_KO_c12.2 | TCACGGGC-----                                                            |
| GSN_KO_c13.1 | CGTGCAGCTGGATGACTACCTGAACGGCCGGGCCGTGCAGCACCGTGCAGCTGGATGACT             |
| GSN_KO_c13.2 | TGGATGA-----                                                             |
| CTRL_KO      | -----CTAC-----CTGAACGGCCGGGCCGT                                          |
| GSN_KO_c11.1 | GTG-----C-----AGCACC-----TATGACTACCTGAACGT                               |
| GSN_KO_c11.2 | ACCTGAACGGCCCGT-----TACCGT-----GCAGCTGGATTACCGT                          |
| GSN_KO_c12.1 | -----                                                                    |
| GSN_KO_c12.2 | -----                                                                    |
| GSN_KO_c13.1 | ACCTGAACGGCCGGGCCGTGTTACCGTGCAGCTGGATGACTACCTGAACGGCCGGGCCGT             |
| GSN_KO_c13.2 | -----CTAC-----CTGAACGGCCGGGCCGT                                          |
| CTRL_KO      | GCAGCACCGTGAGGTCCAGGGCTTCGAGTCGGCCACCTTCCTAGGCTACTTCAAGTCTGG             |
| GSN_KO_c11.1 | GCAGCACCGTGAGGTCCAGGGCTTCGAGTCGGCCACCTTCCTAGGCTACTTCAAGTCTGG             |
| GSN_KO_c11.2 | GCAGCTGGATGAGGTCCAGGGCTTCGAGTCGGCCACCTTCCTAGGCTTCTTCAAGTCTGG             |
| GSN_KO_c12.1 | ---TGATGGTGAGGTCCAGGGCTTCGAGTCGGCCACCTTCCTAGGCTACTTCAAGTCTGG             |
| GSN_KO_c12.2 | -CGTGAGCACCGGTCCAGGGCTTCGAGTCGGCCACCTTCCTAGGCTACTTCAAGTCTGG              |
| GSN_KO_c13.1 | GCAGCACCGTGAGGTCCAGGGCTTCGAGTCGGCCACCTTCCTAGGCTACTTCAAGTCTGG             |
| GSN_KO_c13.2 | GCAGCACCGTGAGGTCCAGGGCTTCGAGTCGGCCACCTTCCTAGGCTACTTCAAGTCTGG             |
|              | *****                                                                    |
| CTRL_KO      | CCTGAAGTACAAGGTGGGTGGGCCCCACCTTGCTTGAGCGGTAGGGACAGATGCACCAG              |
| GSN_KO_c11.1 | CCTGAAGTACAAGGTGGGTGGGCCCCACCTTGCTTGAGCGGTAGGGACAGATGCACCAG              |
| GSN_KO_c11.2 | CCTGAAGTACAAGGTGGGTGGGCCCCACCTTGCTTGAGCGGTAGGGACAGATGCACCAG              |
| GSN_KO_c12.1 | CCTGAAGTACAAGGTGGGTGGGCCCCACCTTGCTTGAGCGGTAGGGACAGATGCACCAG              |
| GSN_KO_c12.2 | CCTGAAGTACAAGGTGGGTGGGCCCCACCTTGCTTGAGCGGTAGGGACAGATGCACCAG              |
| GSN_KO_c13.1 | CCTGAAGTACAAGGTGGGTGGGCCCCACCTTGCTTGAGCGGTAGGGACAGATGCACCAG              |
| GSN_KO_c13.2 | CCTGAAGTACAAGGTGGGTGGGCCCCACCTTGCTTGAGCGGTAGGGACAGATGCACCAG              |
|              | *****                                                                    |

**Fig. S4 Analysis of gDNA of obtained clones to check whether gene editing took place.** Upon isolation of gDNA from the clones, PCR reactions were performed with appropriate starters and gDNAs as templates. Products were then cloned into the pAcGFP-C1 plasmid and selected plasmid clones were sequenced. The alleles with changes in the coding regions but without shifted ORFs are highlighted in red. The other alleles have out of frame open reading frame (ORF) in the region coding for GSN. The star indicates identical nucleotide in a given position for every allele.



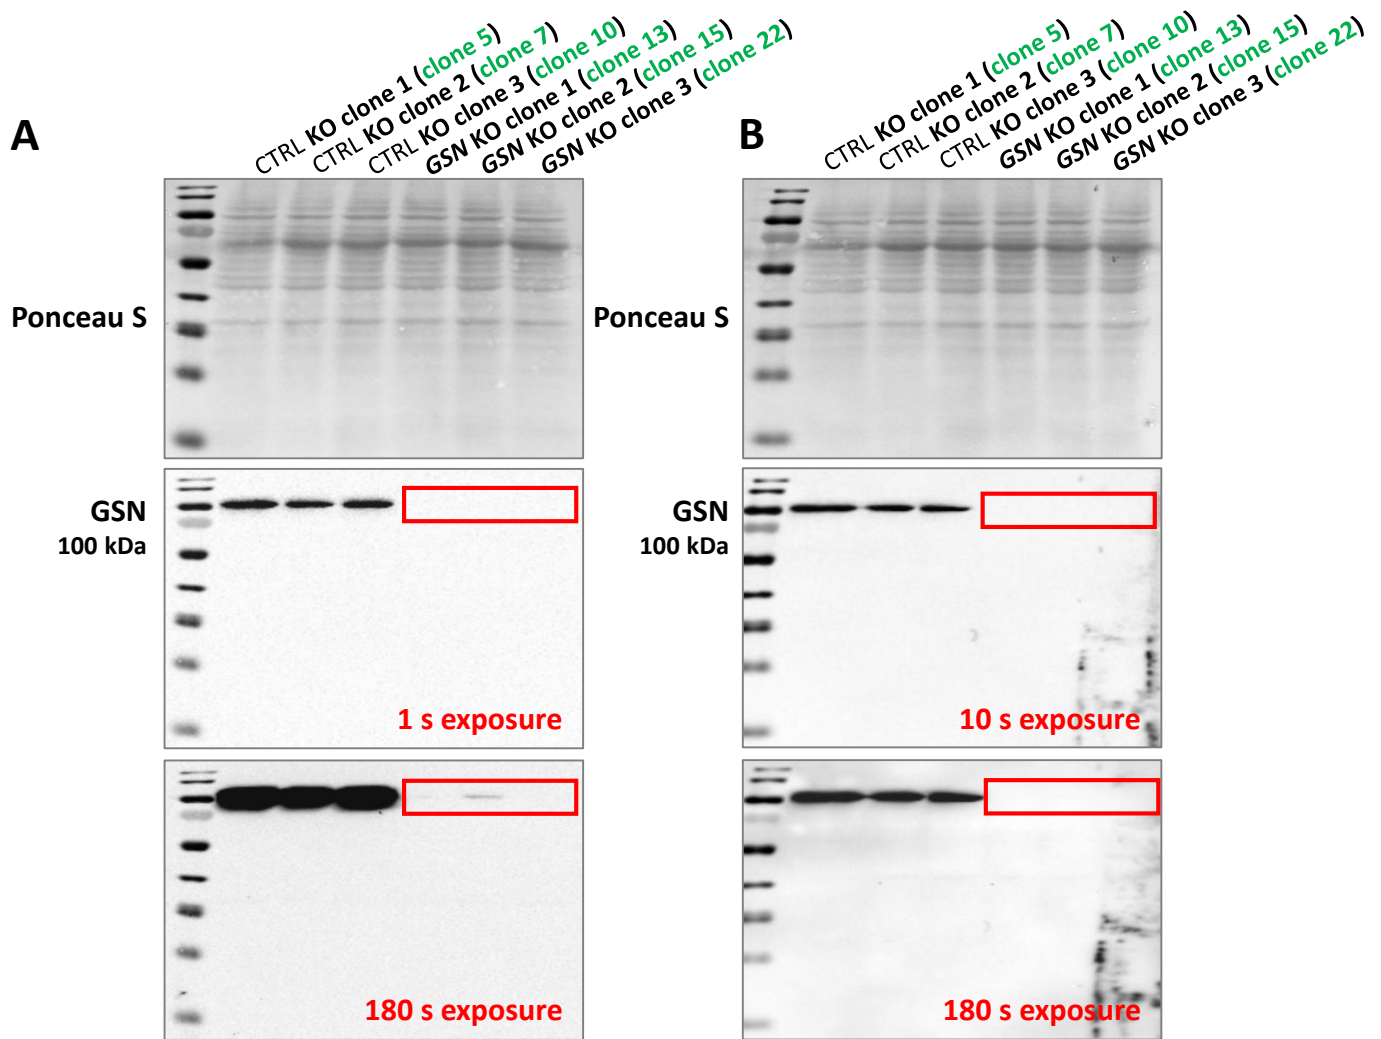

**Fig. S5 Among GSN KO clones, only GSN KO clone 2 produces small amounts of GSN.** Western blot analysis of clones' lysates for the presence of GSN. The membranes were probed for GSN with mouse anti-GSN (**A**) and goat anti-GSN (**B**) antibodies. 30  $\mu$ g of protein were loaded on every lane. Long and short exposure times were applied. Red rectangles highlight GSN bands in the lysates of GSN KO clones. Ponceau S membrane stainings were performed as total protein analysis (TPA) of the membranes.

CTRL KO

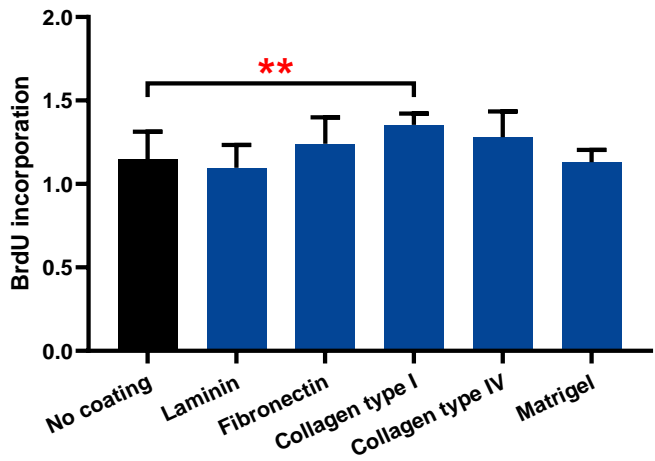

GSN KO

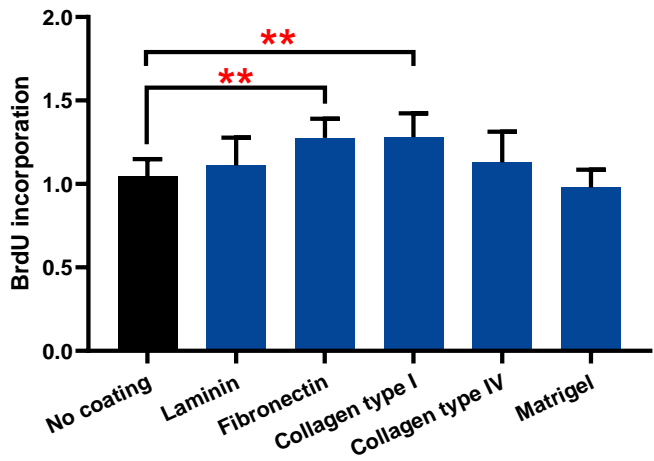

**Fig. S6 Some ECM proteins have an influence on A375 cells proliferation rate.** BrdU assay was performed on cells growing on different ECM proteins for 72 h ( $n = 8-9$ ); Kruskal-Wallis one-way ANOVA test with post hoc (Dunn's multiple comparisons) test. Results are expressed as the mean  $\pm$  SD;  $p \leq 0.01$  (\*\*). This figure corresponds to Fig. 5A in the main text. The results were calculated separately for CTRL KO and GSN KO clones.

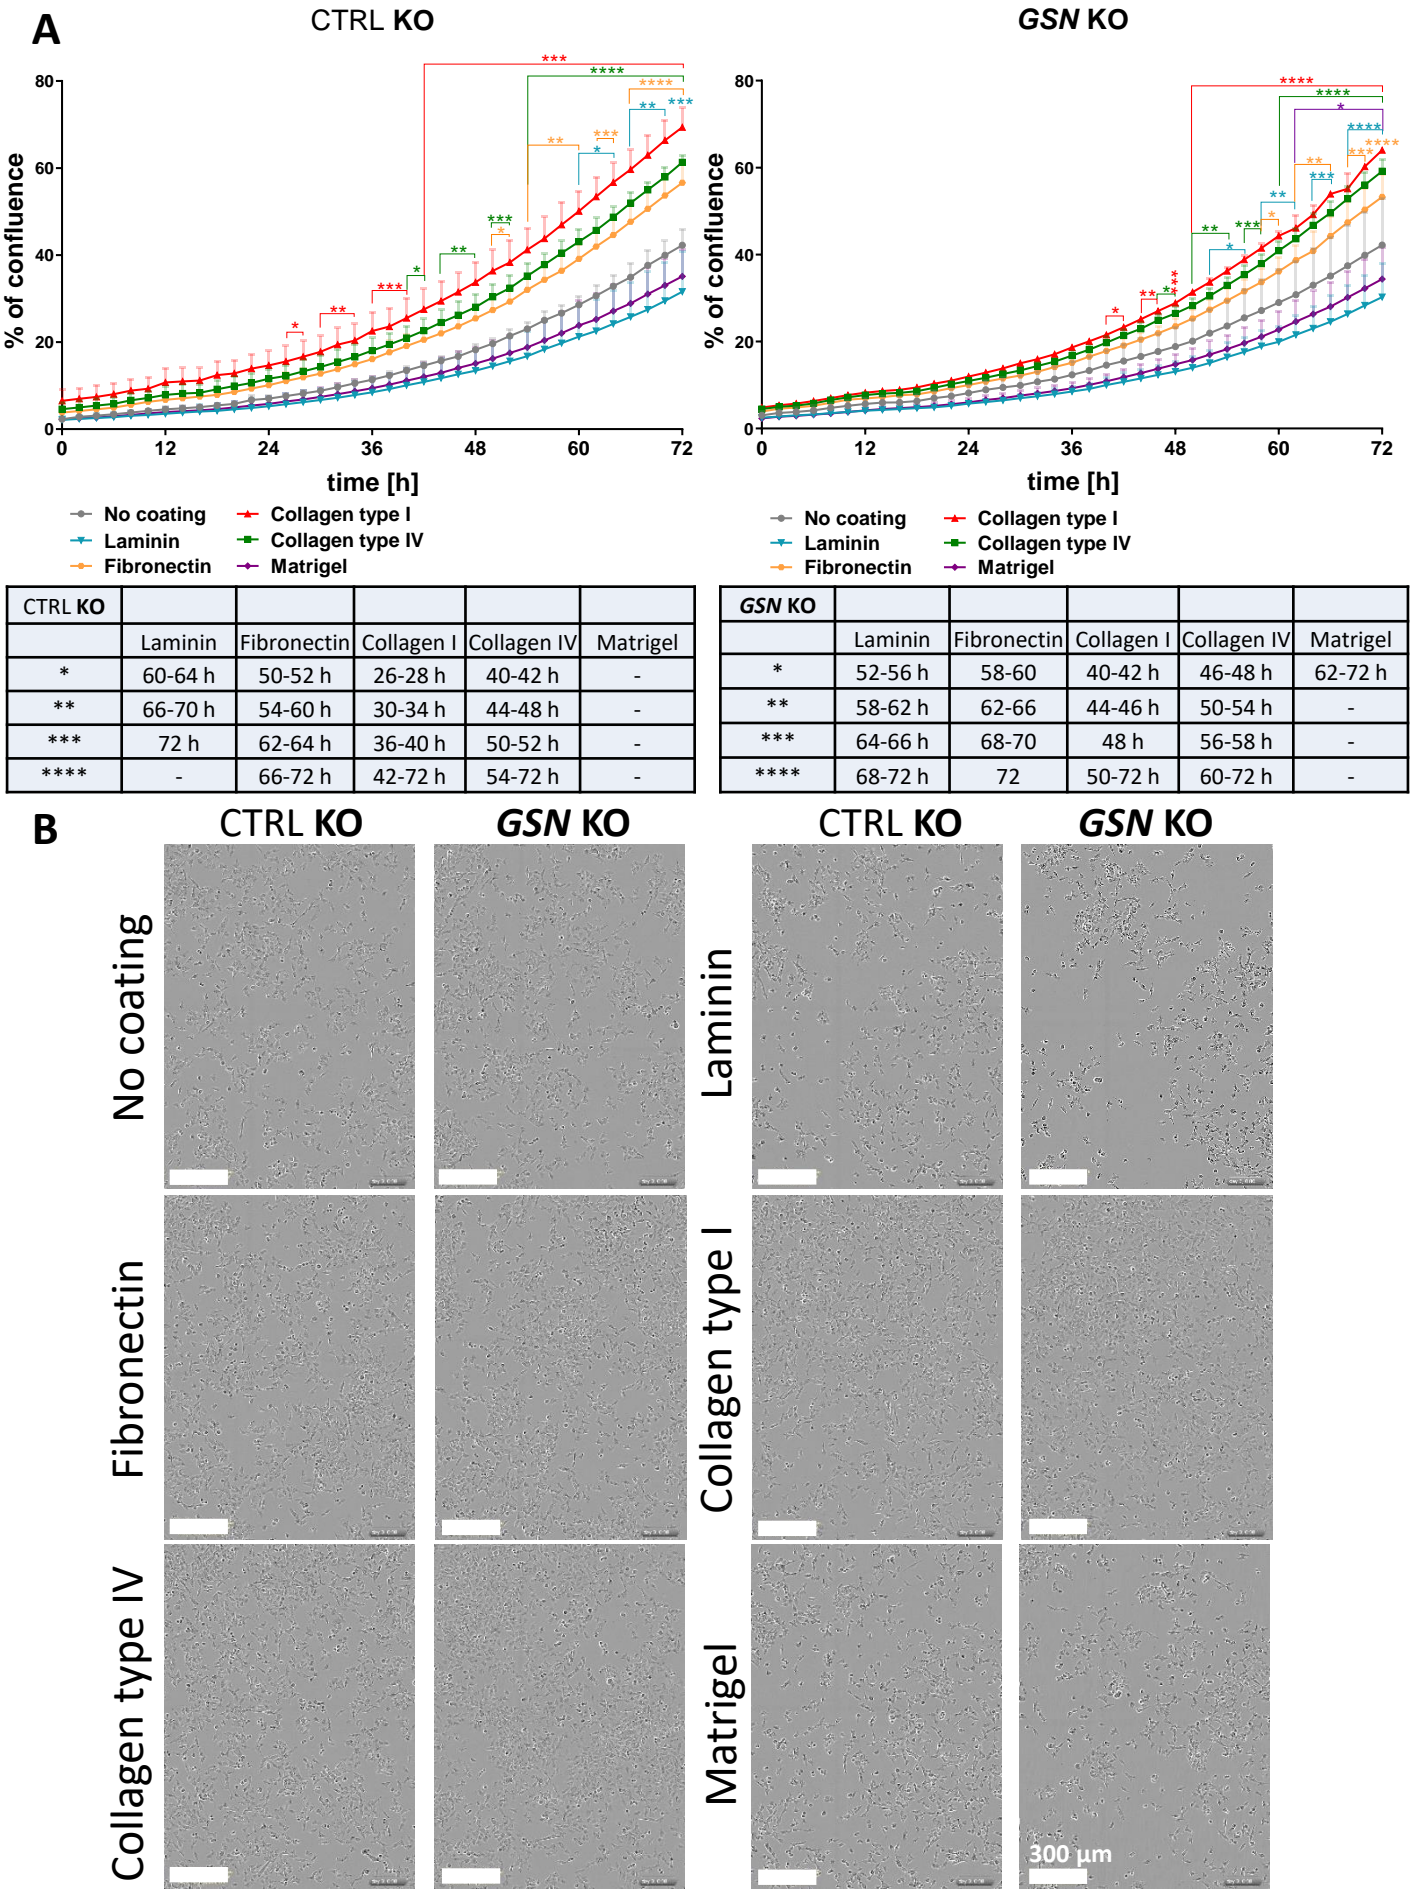



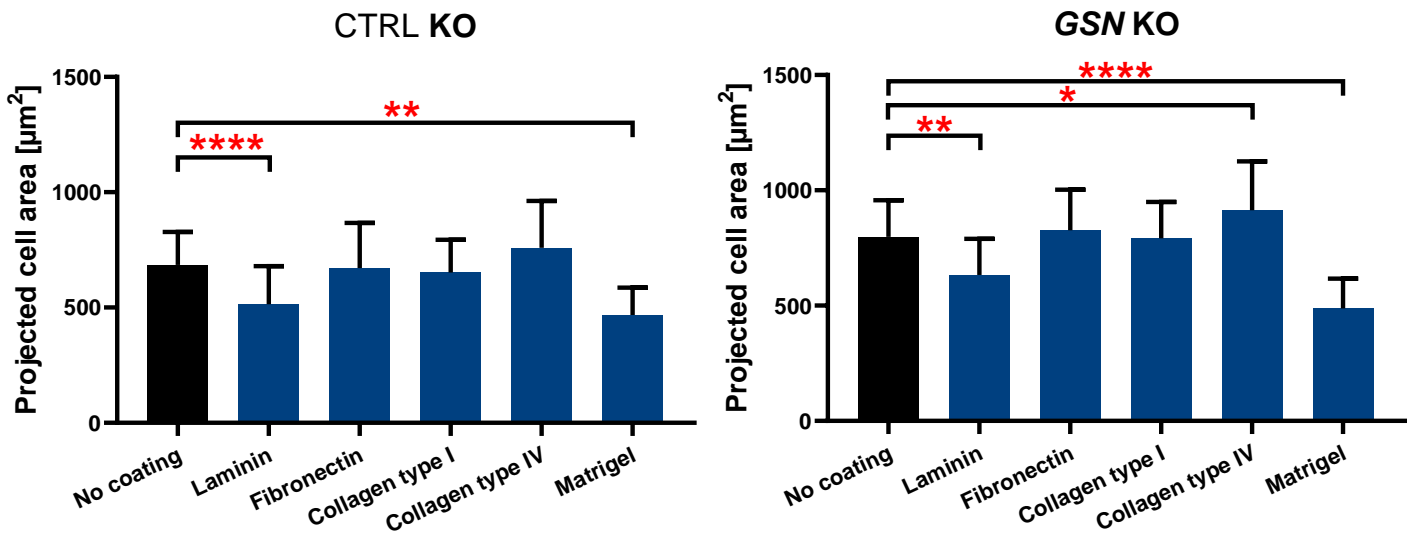

**Fig. S8 Different influence of ECM proteins on the A375 projected cell's area.** On the basis of the photos taken 48 h after seeding the cells onto coated coverslips with selected ECM proteins (presented in Fig. 7) the projected cell's area was evaluated with ImageJ as described in the materials and methods section ( $n = 30$ ); Kruskal-Wallis one-way ANOVA test with post hoc (Dunn's multiple comparisons) test. Results are expressed as the mean  $\pm$  SD;  $p \leq 0.05$  (\*),  $p \leq 0.01$  (\*\*) and  $p \leq 0.0001$  (\*\*\*\*). This figure corresponds to Fig. 6 in the main text. The results were calculated separately for the CTRL KO and GSN KO clones.

A

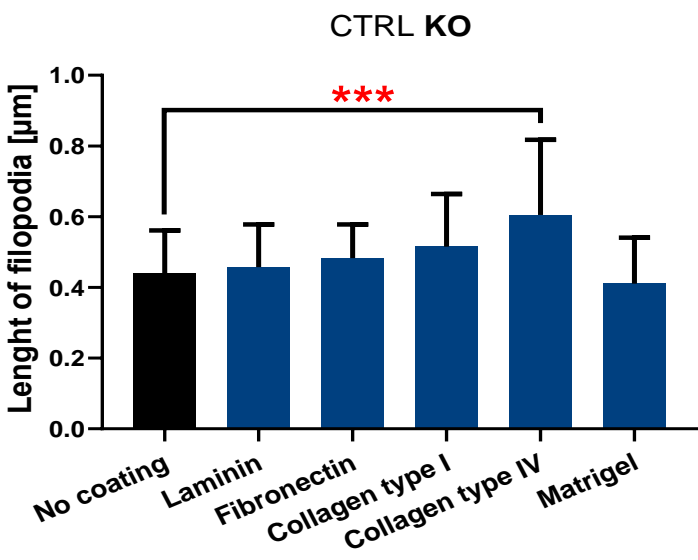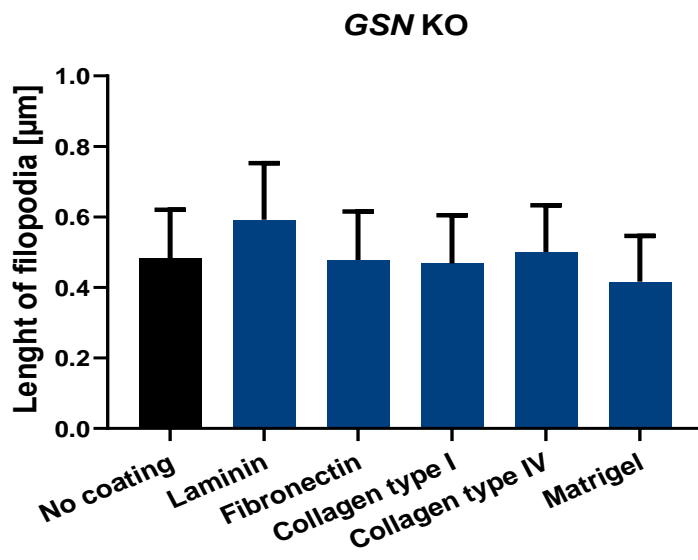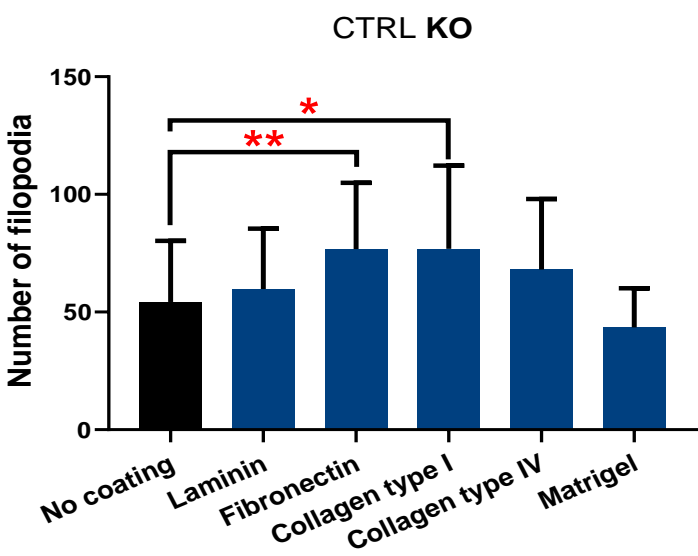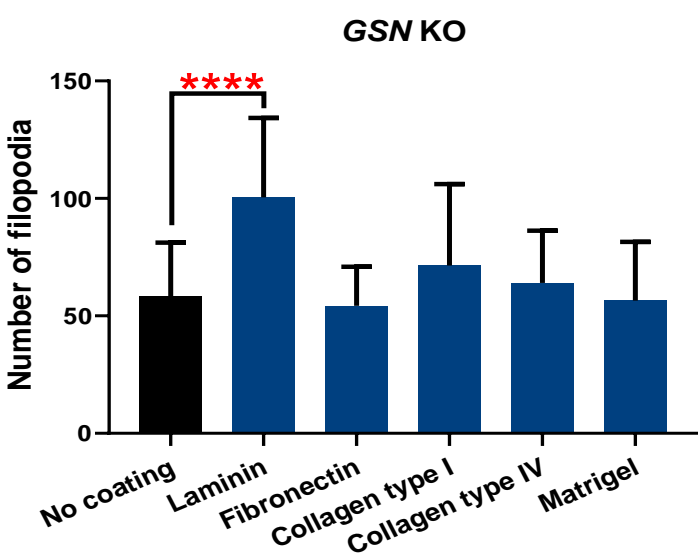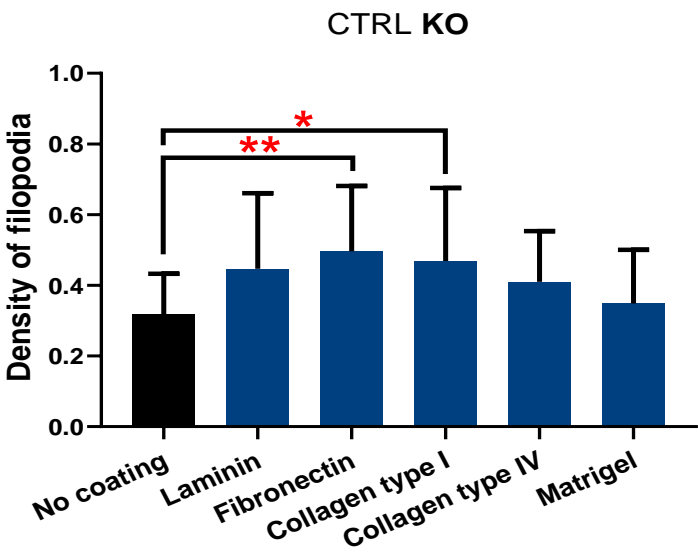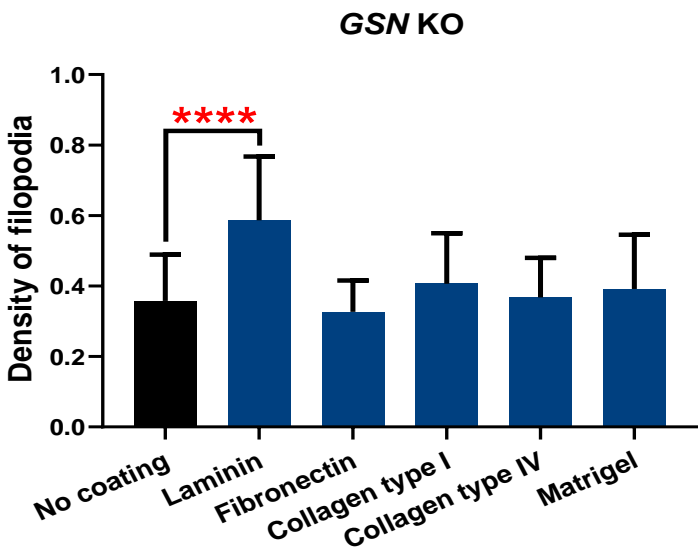

To be continued

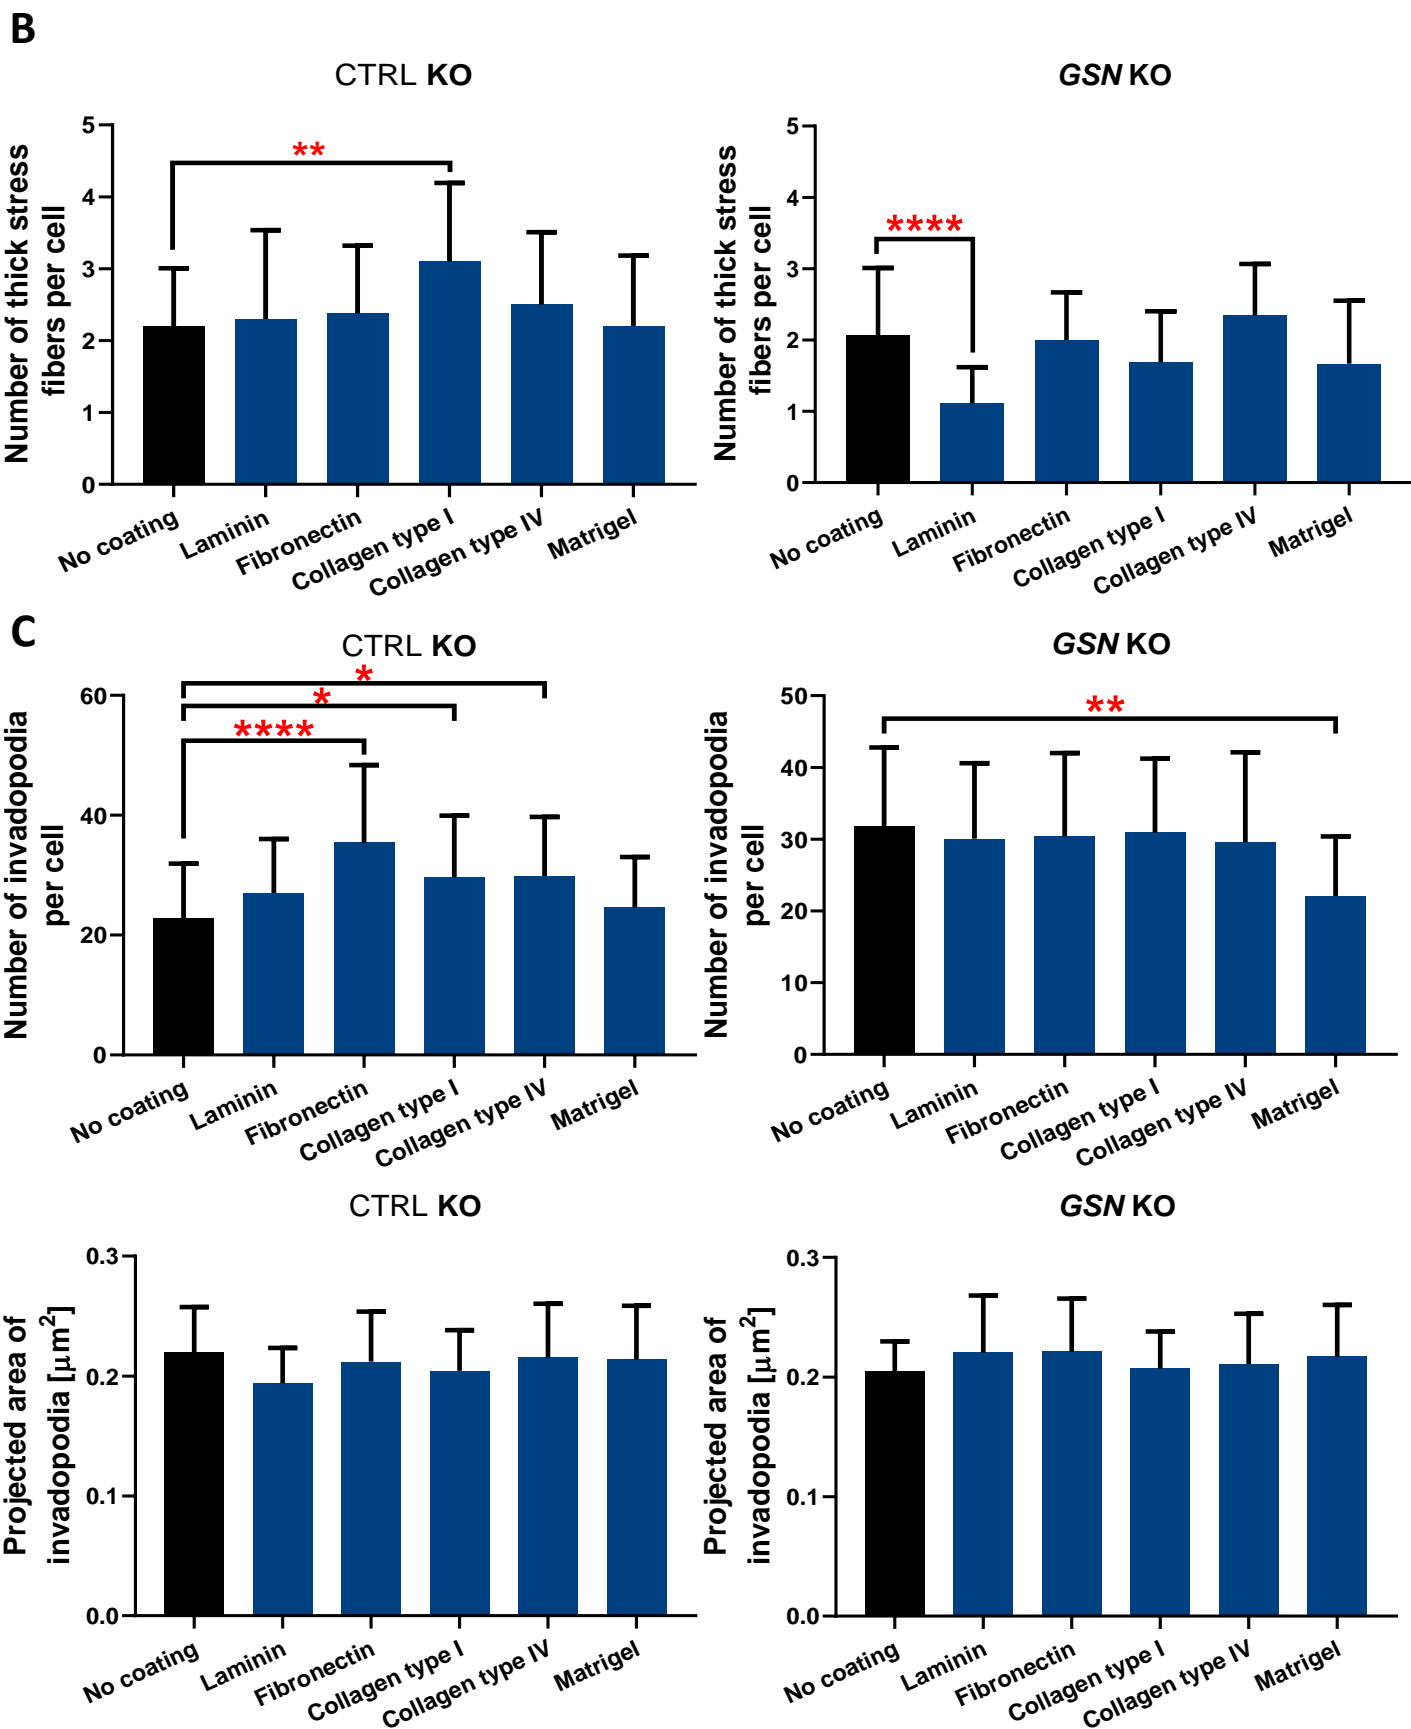

**Fig. S9 Evaluation of the impact of different ECM proteins on the formation of filopodia, thick actin bundles and invadopodia in control and GSN KO clones.** The cells were seeded onto ECM proteins and 48 h later fixed and stained to detect cortactin and F-actin. Microphotographs were taken with the help of SIM microscopy. Basing on the photos and methods described in the Materials and methods section the number, length and density of filopodia (A), the number of thick actin bundles (B), and the number of invadopodia (C) were measured ( $n = 30$ ). Results are expressed as the mean  $\pm$  SD;  $p \leq 0.05$  (\*),  $p \leq 0.01$  (\*\*),  $p \leq 0.001$  (\*\*\*) and  $p \leq 0.0001$  (\*\*\*\*). This figure corresponds to Fig. 7 in the main text. The results were calculated separately for the CTRL KO and GSN KO clones; ordinary and Kruskal-Wallis one-way ANOVA tests with post hoc (Dunn's multiple comparisons) test.

**A**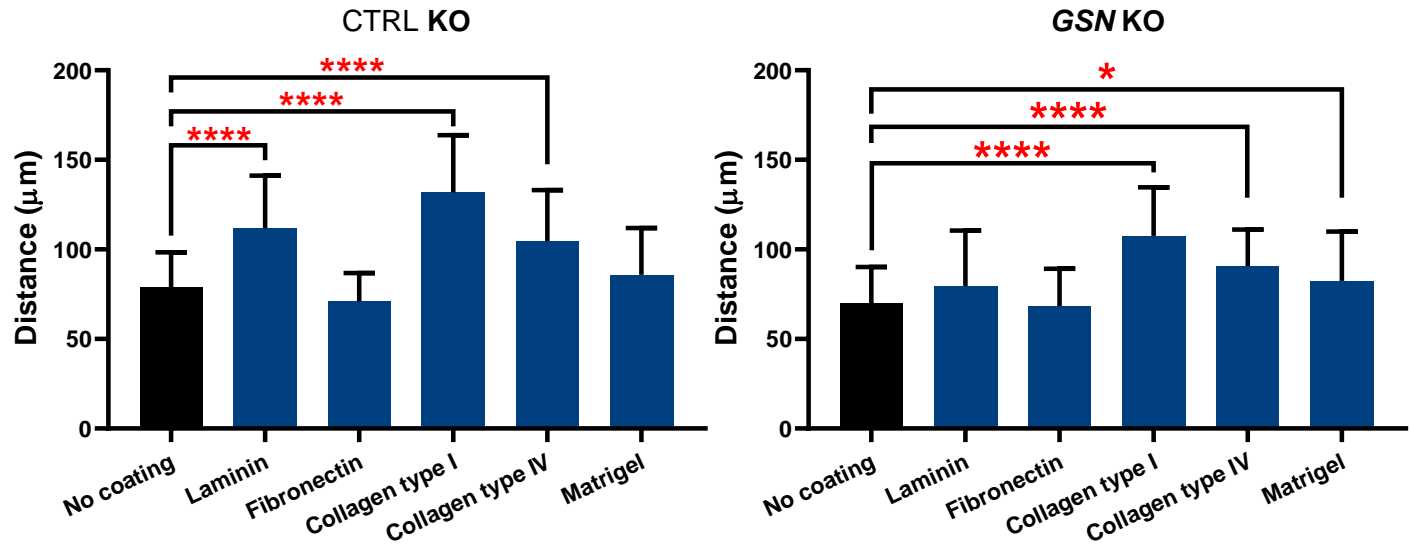**B**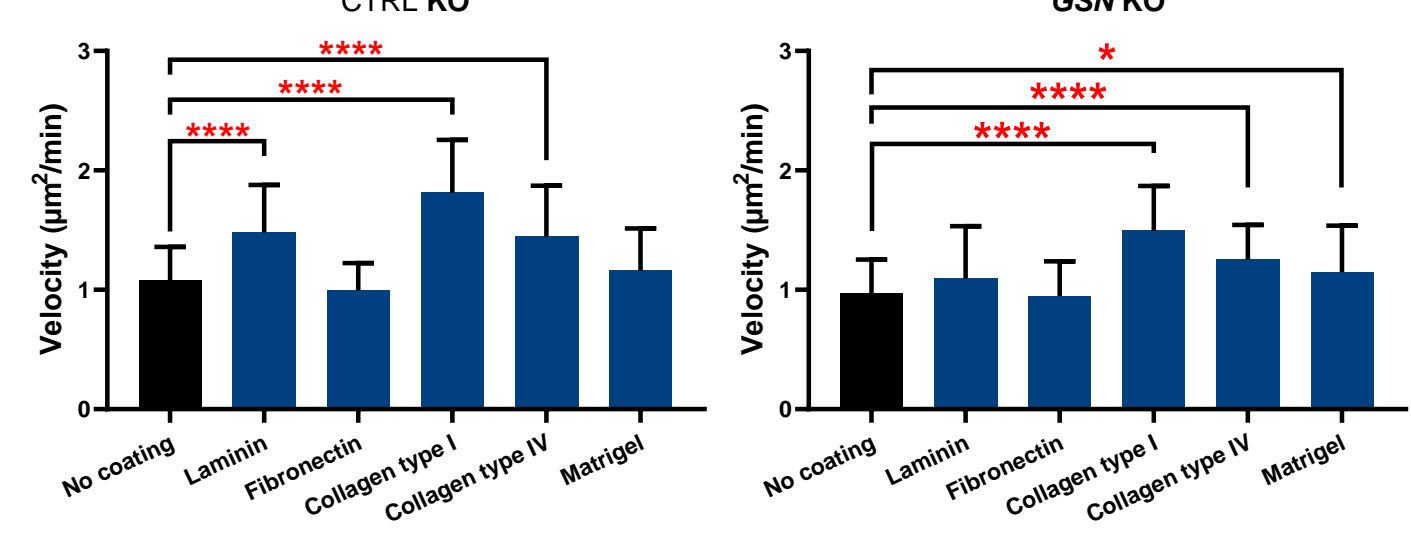**C**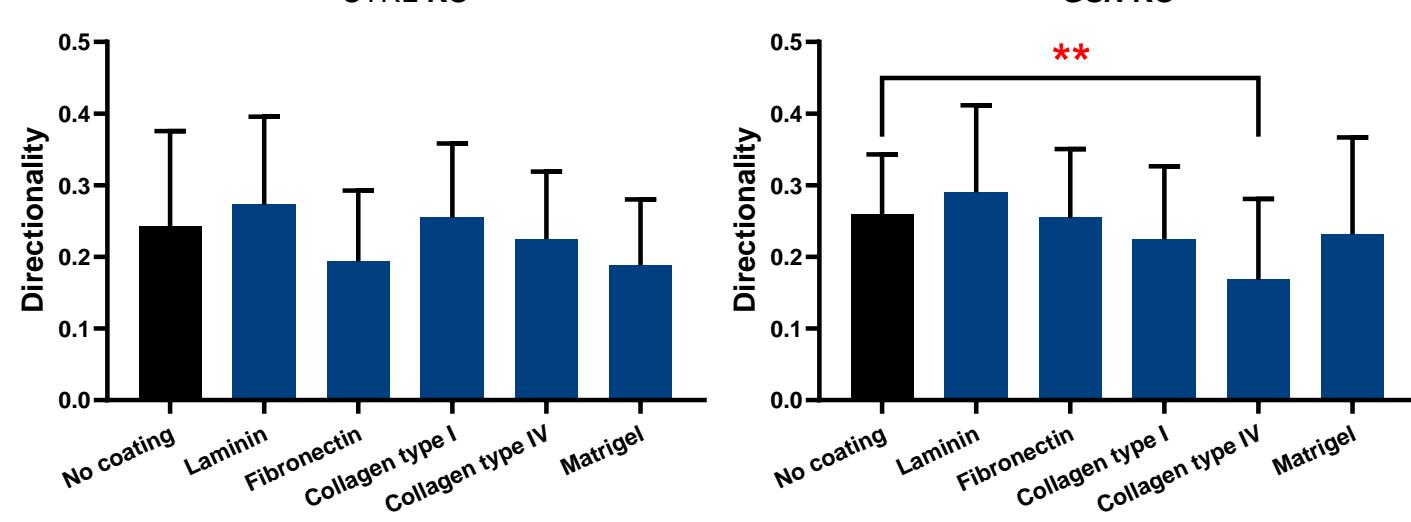

**Fig. S10 ECM proteins differently influence spontaneous migration of control and GSN KO clones.** The cells were seeded into coated wells with different ECM proteins of 96-well ImageLock plate. For 72 h hours the cells were monitored with the IncuCyte system. Next trajectories of single cells ( $n = 90$ ) were plotted and (A) distance ( $n = 90$ ), (B) velocity ( $n = 90$ ) and (C) directionality ( $n = 30$ ) of moving cells were assessed. Results are expressed as the mean  $\pm$  SD;  $p \leq 0.05$  (\*),  $p \leq 0.01$  (\*\*) and  $p \leq 0.0001$  (\*\*\*\*). This figure corresponds to Fig. 8 in the main text. The results were calculated separately for the CTRL KO and GSN KO clones; ordinary and Kruskal-Wallis one-way ANOVA tests with post hoc (Dunn's multiple comparisons) test.



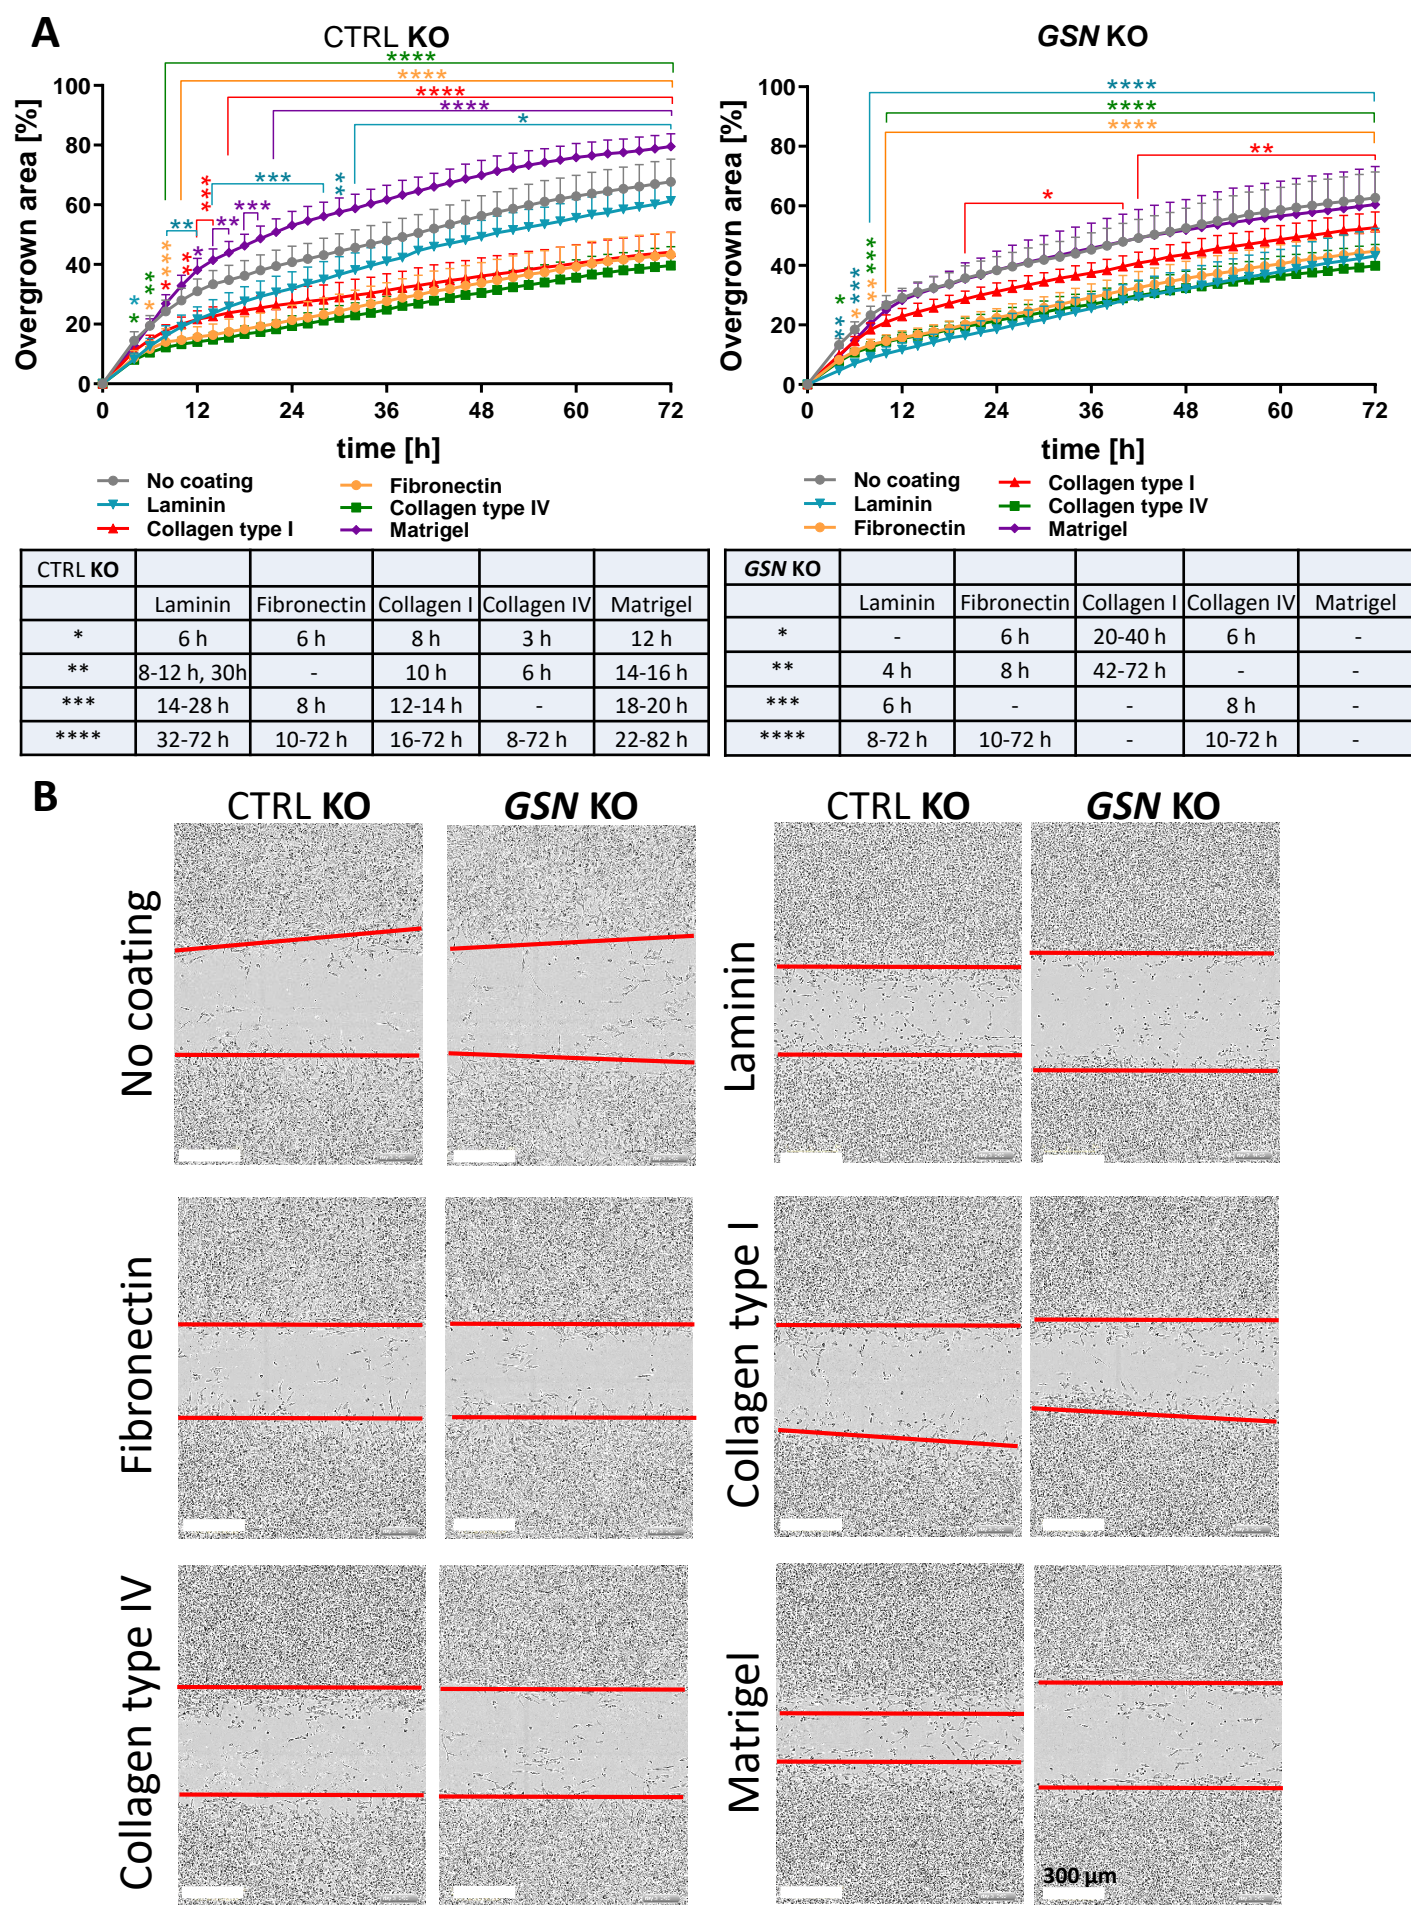

**Fig. S11 Depending on the ECM protein there are differences in collective migration of control and GSN KO clones. (A)** The cells upon making the wound with Wound Maker were monitored for 72 h. Every 2 h a photo was taken. Next the percentage of overgrown scratch by the cells over time was calculated with IncuCyte software ( $n = 6$ ). Statistical significance is shown both on the graphs and in a table;  $p \leq 0.01$  (\*),  $p \leq 0.01$  (\*\*),  $p \leq 0.001$  (\*\*\*) and  $p \leq 0.0001$  (\*\*\*\*). The results were calculated separately for CTRL KO and GSN KO clones; two-way ANOVA with post hoc (Dunn's multiple comparisons) test **(B)** Representative photos taken 72 h after seeding the cells onto studied here ECM proteins. This figure corresponds to Fig. 9 in the main text.
